# Supplementary material for: ZENBU-Reports: a graphical web-portal builder for interactive visualization and dissemination of genome-scale data
Source: PubMed Central journal article supplement (PMC10440783; doi:10.1093/nargab/lqad075), 2023-08-21
Supplement: lqad075_supplemental_file.pdf [file lqad075_supplemental_file.pdf]

# ZENBU-Reports: Supplemental figures

## heart CAGE DE TRE

109 heart CAGE libraries on hg38 with gene models and differentially expressed TRE

### Differential expression view

This page provide interactive MA plots for Atrium and Ventricle - healthy vs failing comparisons. Data is prefiltered with FDR < 0.1, whole tables are available in supplementary table 9 of the manuscript.

Legend for DE TRE tracks:

- ▶ - failing atrium TRE; ▶ - healthy atrium TRE;
- ▶ - failing ventricle TRE; ▶ - healthy ventricle TRE; ▶ - not DE TRE;

DE TRE - differentially expressed transcribed regulatory elements in heart, FDR < 0.05,  $|\log_2FC| > 1$

Legend heart CAGE consensus regions track:

- Encode based: ▶ - promoter; ▶ - proximal enhancer; ▶ - distal enhancer.
- heart CAGE based: ▶ - promoter; ▶ - unidirectional enhancer; ▶ - bidirectional enhancer.

### DE TRE in Atrium

### DE TRE in Ventricle

| cluster_id1 | GeneName     | tagcounts | location                 |
|-------------|--------------|-----------|--------------------------|
| rDPI_10060  | AMOTL1       | 2337      | <a href="#">location</a> |
| rDPI_40203  | C4orf54      | 3525      | <a href="#">location</a> |
| rDPI_43183  | LOC101927046 | 1938      | <a href="#">location</a> |
| rDPI_4062   | LOC105371646 | 4190      | <a href="#">location</a> |
| rDPI_7990   | LOC105376520 | 7924      | <a href="#">location</a> |
| rDPI_6350   | LOC105378351 | 2259      | <a href="#">location</a> |
| rDPI_7076   | LOC107984260 | 3131      | <a href="#">location</a> |
| rDPI_5131   | LOC107985362 | 1803      | <a href="#">location</a> |
| rDPI_14727  | TRAJ49       | 3655      | <a href="#">location</a> |
| rDPI_19788  |              | 410       | <a href="#">location</a> |
| rDPI_6558   |              | 26274     | <a href="#">location</a> |
| rDPI_6609   |              | 1738      | <a href="#">location</a> |
| rDPI_38875  |              | 415       | <a href="#">location</a> |
| rDPI_29970  |              | 37779     | <a href="#">location</a> |

<< 1 ... 1 >> page: 1 14 rows

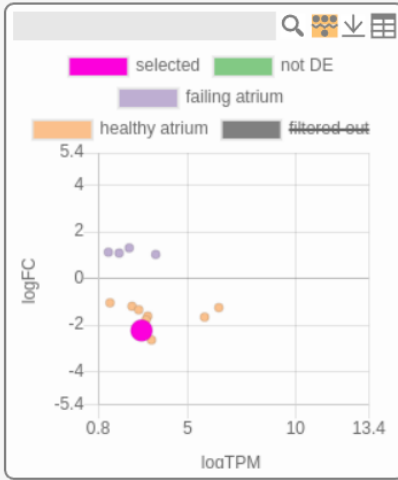

#### consensus\_regions\_class

- enhancer 14
- alternative TSS 19
- promoter 18

#### localization

- Intron 6
- Distal 5
- Promoter 1

#### chip\_class

- active\_enhancer 14
- active\_promoter 76
- low signal 16

#### biotype

- NA 5
- protein\_coding 5

search for annotations (eg EGR1 or kinase) or set location (eg: chr19:36373808-36403118) search clear

hg38 chr14 22,489,162-22,489,567+ [len 406bp] 22489352 << < > >> +10x +5x +2x -2x -5x -10x settings export svg

hg38 chr14 22489162..22489567+ [len 406bp]

ENTREZ GENE hg38  
GENCODE v37  
heart CAGE TRE DE in Atrium  
heart CAGE TRE DE in Ventricle  
heart CAGE CTSS tracks for healthy vs failing Atrium and Ventricle [rev:0.04 fwd:2.3 scale:2.26] (mean) tagcount\_pm  
DE: failing\_A (15 expts)  
DE: failing\_V (18 expts)  
DE: healthy\_A (42 expts)  
DE: healthy\_V (34 expts)  
heart CAGE consensus regions (promoters, enhancers proximal and distal - Encode based)

+ create custom track + add predefined tracks

#### heart CAGE CTSS tracks for healthy vs failing Atrium and Ven

chr14 22489162..22489567 (406bp) STAT FLT

metadata group [DE] (109 / 109 expts) <- anti-sense strand > sense strand >

- DE: failing\_A (15 expts) 0.0331
- DE: failing\_V (18 expts) 0.0071
- DE: healthy\_A (42 expts) 14.719
- DE: healthy\_V (34 expts) 0.1361
- UNKNOWN - no metadata key (0 expts) 0.0

Supplemental Figure 1. ZENBU-Reports page from the Atlas of Heart Promoters and Enhancers (1).

## Target subcellular localization

Expression profiling by RNA-seq using cytoplasmic, nuclear soluble, and chromatin-bound RNA was used to measure the relative prevalence of each lncRNA in these three subcellular compartments. The table shows the measured expression in the three compartments for each lncRNA both in counts-per-million ("cpm") and as a percentage value of the relative fraction ("frac"). Based on these values, each lncRNA was assigned to a subcellular compartment as shown in the column "localization". The scatter plots below show pairwise comparisons of the fractional expression values in the three compartments. Data source: Ramiowski JR, et al Genome Research 2020 DOI: [10.1101/gr.254219.119](https://doi.org/10.1101/gr.254219.119); PMID: [32718982](https://pubmed.ncbi.nlm.nih.gov/32718982/); PMCID: [PMC7397864](https://pubmed.ncbi.nlm.nih.gov/PMC7397864/)

**Localization**

Chromatin bound 20

Cytoplasmic 14

Nuclear soluble 10

**FANTOM6 DMFB targets**

| target                       | KD_geneID       | localization    | GSEA | DESeq | MARA | Chr_cpm | Nuc_cpm | Cyt_cpm | Ch |
|------------------------------|-----------------|-----------------|------|-------|------|---------|---------|---------|----|
| <a href="#">RPL15B.L7.5</a>  | ENSG00000216775 | Nuclear soluble | GSEA | DESeq | MARA | 7.677   | 13.14   | 12.98   |    |
| <a href="#">RPH1-338L1</a>   | ENSG00000245958 | Chromatin bound | GSEA | DESeq | MARA | 30.26   | 9.186   | 5.483   |    |
| <a href="#">SNHG18</a>       | ENSG00000250786 | Nuclear soluble | GSEA | DESeq | MARA | 21.68   | 37.02   | 17.80   |    |
| <a href="#">NNT-AS1</a>      | ENSG00000248092 | Cytoplasmic     | GSEA | DESeq | MARA | 7.334   | 8.695   | 14.93   |    |
| <a href="#">CKMT2-AS1</a>    | ENSG00000247572 | Chromatin bound | GSEA | DESeq | MARA | 18.90   | 9.441   | 14.78   |    |
| <a href="#">NR2F1-AS1</a>    | ENSG00000237187 | Chromatin bound | GSEA | DESeq | MARA | 49.31   | 11.37   | 24.03   |    |
| <a href="#">CTC-228N24.3</a> | ENSG00000245837 | Chromatin bound | GSEA | DESeq | MARA | 112.3   | 12.34   | 10.49   |    |
| <a href="#">GOS5-AS1</a>     | ENSG00000225733 | Cytoplasmic     | GSEA | DESeq | MARA | 13.80   | 74.01   | 168.8   |    |
| <a href="#">LINC00886</a>    | ENSG00000240875 | Chromatin bound | GSEA | DESeq | MARA | 15.12   | 6.603   | 6.310   |    |
| <a href="#">TEBC</a>         | ENSG00000270141 | Nuclear soluble | GSEA | DESeq | MARA | 24.69   | 148.1   | 20.09   |    |
| <a href="#">AC007246.3</a>   | ENSG00000231312 | Chromatin bound | GSEA | DESeq | MARA | 39.62   | 13.92   | 17.34   |    |
| <a href="#">AC009948.5</a>   | ENSG00000223960 | Cytoplasmic     | GSEA | DESeq | MARA | 15.10   | 13.58   | 17.95   |    |
| <a href="#">ITIL-AS1</a>     | ENSG00000237298 | Chromatin bound | GSEA | DESeq | MARA | 63.41   | 8.615   | 10.41   |    |
| <a href="#">DNM3OS</a>       | ENSG00000230630 | Nuclear soluble | GSEA | DESeq | MARA | 48.06   | 54.37   | 8.942   |    |

<< previous page | Page: 1 | 2 | 3 | next page >> | page: 3 | rows: 15

**Signal data filters**

**Chr\_cpm**  absolute value   
cutoffs min: 5.00000 max: max

**Nuc\_cpm**  absolute value   
cutoffs min: 5.00000 max: max

**Cyt\_cpm**  absolute value   
cutoffs min: 5.00000 max: max

Design\_ASOS\_per\_target

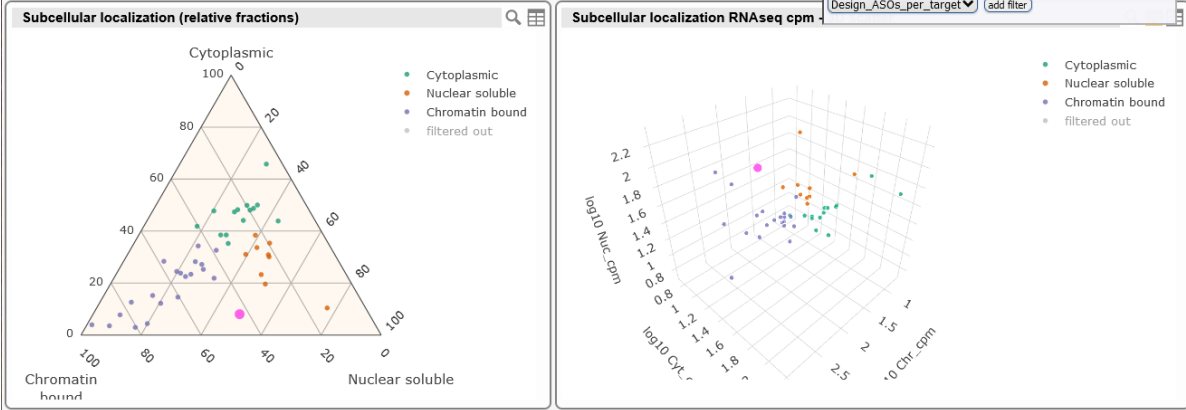

search for annotations (eg EGR1 or kinase) or set location (eg: chr19:36373808-36403118)

hg38 chr1 172,136,449-172,144,876+ [len 8.4kb] [87728163](#)

hg38 chr1 172136449..172144876+ [len 8.428kb]

Ensembl gene hg38

DMN3OS

MIR214

MIR3120

MIR199A2

[Gene model] FANTOM6 CAT gene info [rev:2. fvd:31] (mean) numPmtmr

CATG00000082745

CATG00000025347

30

ENSG00000208024

[Gene model] GENCODEv25, transcripts

F6 HDF ASO: CAGE signal KD-ref (runs 1-21) - 20170223

F6 HDF: RNA-seq

F6 HDF ASO: CAT TSS merged promoters regions with HDF CAGE signal (runs 1-21) - 20170223 - group by KD target

F6 HDF: set1 lncRNA target transcript

F6 HDF: adHoc; DMFB\_ASO\_1ffover\_from\_hg19\_to\_hg38; batich1\_to\_9\_exlon

G0230630|ENSG00000230630:1|ENST00000417354:1

DMFB qPCR primers (n=900), paired, hg38, (fflcover from hg19)

DMFB qPCR primers (n=900), single, hg38, (fflcover from hg19)

F6 HDF: fractionation RNAseq (rev:2.0 fvd:0.06 scale:2.05) (mean) tpm

fraction: chromatin (2 exps)

fraction: cytoplasmic (2 exps)

fraction: nuclear (2 exps)

**F6 HDF : fractionation RNAseq**

metadata group [fraction] (6 / 6 exps)

- fraction: chromatin (2 exps)
- fraction: cytoplasmic (2 exps)
- fraction: nuclear (2 exps)
- UNKNOWN - no metadata key (0 exps)

chr1 172136449..172144876 (8.4kb) [STAT] [ELT]

<- anti-sense strand > sense strand ->

30.291 11.76

4.72 10.21

19.807 11.6

**Supplemental Figure 2.** ZENBU-Reports page showing subcellular localization data of lncRNAs included in FANTOM6 (2).

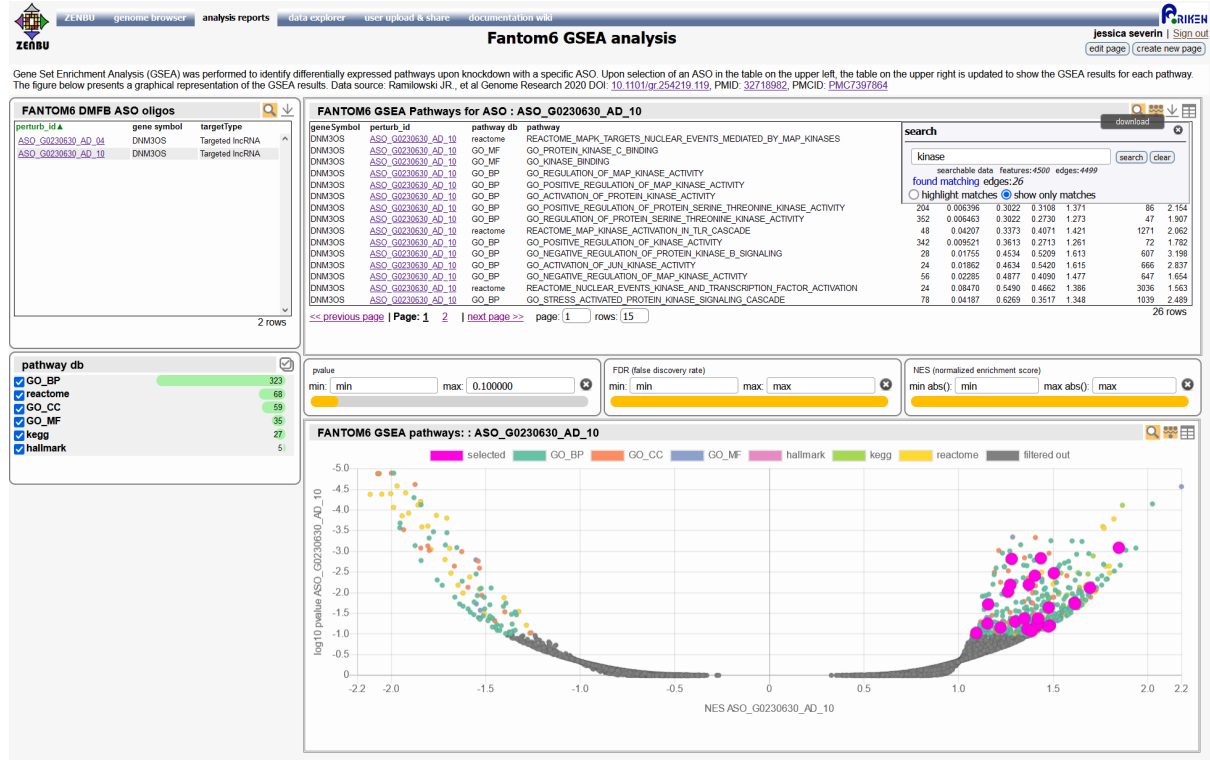

**Supplemental Figure 3. Gene Set Enrichment Analysis results obtained in FANTOM6 (2),**

### Identification of therapeutic targets in high-risk poor-outcome AML patients

| Fig1f Revigo data                                      |            |               |            |                |           |                |            |           |         |        |
|--------------------------------------------------------|------------|---------------|------------|----------------|-----------|----------------|------------|-----------|---------|--------|
| description                                            | term_ID    | log10_p-value | uniqueness | dispensability | frequency | representative | eliminated | plot_size | plot_X  | plot_Y |
| immune effector process                                | GO:0002252 | -18.18        | 0.6740     | 0              | 0.1500    | 2252           | 0          | 4.375     | -5.384  | 2.686  |
| regulation of multicellular organismal process         | GO:0051239 | -12.93        | 0.6740     | 0.2440         | 0.6300    | 51239          | 0          | 4.906     | 7.947   | 2.674  |
| cell migration                                         | GO:0016477 | -11.82        | 0.7380     | 0.2570         | 0.2900    | 16477          | 0          | 4.575     | 2.604   | -5.273 |
| response to external biotic stimulus                   | GO:0043207 | -9.483        | 0.7290     | 0.3360         | 0.3000    | 43207          | 0          | 4.585     | -1.443  | 8.059  |
| regulation of developmental process                    | GO:0050793 | -8.149        | 0.6830     | 0.2790         | 1.210     | 50793          | 0          | 5.189     | 7.519   | 2.905  |
| regulation of cell proliferation                       | GO:0042127 | -7.939        | 0.7570     | 0.2350         | 0.3100    | 42127          | 0          | 4.603     | 7.336   | 3.966  |
| positive regulation of biological process              | GO:0048518 | -7.225        | 0.7620     | 0.3130         | 1.740     | 48518          | 0          | 5.350     | 8.176   | 3.466  |
| leukocyte activation involved in inflammatory response | GO:0002269 | -6.777        | 0.6630     | 0.4630         | 0         | 2269           | 0          | 0.4770    | -3.397  | 6.258  |
| regulation of localization                             | GO:0032879 | -6.400        | 0.7440     | 0.2830         | 0.7300    | 32879          | 0          | 4.969     | 7.591   | 0.1400 |
| response to organic substance                          | GO:0010033 | -6.230        | 0.7580     | 0.4740         | 0.9000    | 10033          | 0          | 5.062     | -0.9100 | 7.980  |

<< previous page | Page: 1 | 2 | 3 | next page >> page: 1 | rows: 10 | 26 rows

| GOterm expressed genes |          |          |
|------------------------|----------|----------|
| term_ID                | geneName | baseMean |
| GO:0042127             | HOXD13   | 0.9688   |
| GO:0042127             | HP1BP3   | 1043     |
| GO:0042127             | ERS      | 158.8    |
| GO:0042127             | L4R      | 88.40    |
| GO:0042127             | NHA      | 0.9944   |
| GO:0042127             | JAG1     | 188.4    |
| GO:0042127             | JAG2     | 3.565    |
| GO:0042127             | JUN      | 830.9    |
| GO:0042127             | JUNB     | 389.9    |

167 rows

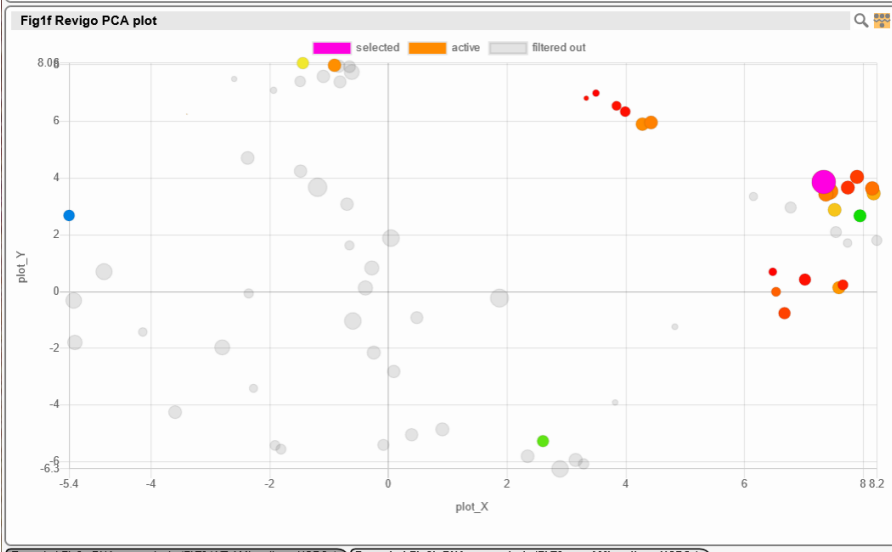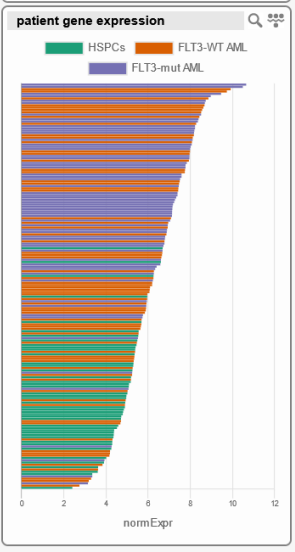

| Extended Fig2a RNAseq analysis (FLT3-WT AML cells vs HSPCs) |          |                |           |           |       |        |  |
|-------------------------------------------------------------|----------|----------------|-----------|-----------|-------|--------|--|
| geneName                                                    | baseMean | log2FoldChange | padj      | pvalue    | stat  | lfcSE  |  |
| JAG1                                                        | 188.4    | 3.903          | 5.750e-18 | 6.530e-21 | 9.381 | 0.4160 |  |

<< previous page | Page: 1 | next page >> page: 1 | rows: 5

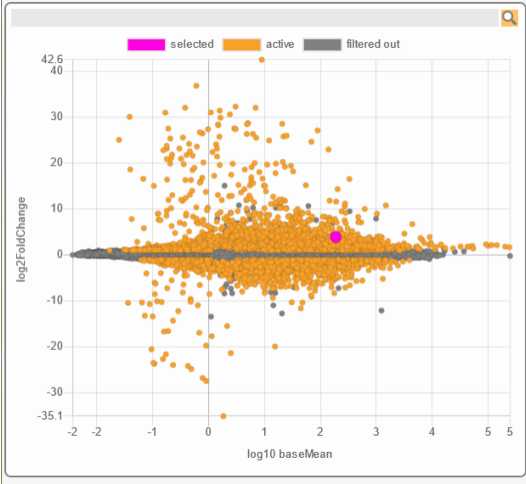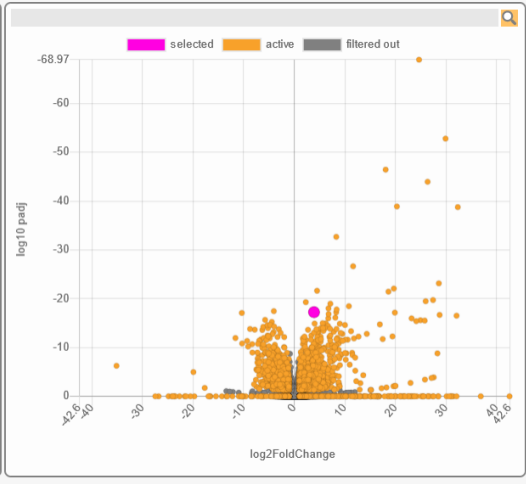

**Supplemental Figure 4.** ZENBU-Reports page providing an interactive PCA plot showing potential therapeutic targets for the treatment of Acute Myeloid Leukemia (3).

## Bibliography

1. Deviatiiarov,R.M., Gams,A., Kulakovskiy,I.V., Buyan,A., Meshcheryakov,G., Syunyaev,R., Singh,R., Shah,P., Tatarinova,T.V., Gusev,O., *et al.* (2023) An atlas of transcribed human cardiac promoters and enhancers reveals an important role of regulatory elements in heart failure. *Nat. Cardiovasc. Res.*, doi: 10.1038/s44161-022-00182-x.
2. Ramilowski,J.A., Yip,C.W., Agrawal,S., Chang,J.-C., Ciani,Y., Kulakovskiy,I.V., Mendez,M., Ooi,J.L.C., Ouyang,J.F., Parkinson,N., *et al.* (2020) Functional annotation of human long noncoding RNAs via molecular phenotyping. *Genome Res.*, **30**, 1060–1072.
3. Hashimoto,M., Saito,Y., Nakagawa,R., Ogahara,I., Takagi,S., Takata,S., Amitani,H., Endo,M., Yuki,H., Ramilowski,J.A., *et al.* (2021) Combined inhibition of XIAP and BCL2 drives maximal therapeutic efficacy in genetically diverse aggressive acute myeloid leukemia. *Nat. Cancer*, **2**, 340–356.
